# Supplementary material for: Genetic and pharmacological interrogation of cancer vulnerability using a multiplexed cell line screening platform
Source: PubMed Central journal article supplement (PMC8253734; doi:10.1038/s42003-021-02352-2), 2021-07-02
Supplement: 42003_2021_2352_MOESM2_ESM.pdf [file 42003_2021_2352_MOESM2_ESM.pdf]

## **Genetic and Pharmacological Interrogation of Cancer Vulnerability Using a Multiplexed Cell Line Screening Platform**

Yifeng Xia<sup>1,\*</sup>, Xiaodong Ji<sup>1,\*</sup>, In Sock Jang<sup>1</sup>, Christine Surka<sup>1</sup>, Christy Hsu<sup>1</sup>, Kai Wang<sup>1</sup>, Mark Rolfe<sup>1</sup>, Neil Bence<sup>1</sup>, Gang Lu<sup>1</sup>

<sup>1</sup>Bristol Myers Squibb, San Diego, CA, USA

## Supplementary Methods

### I. Barcoding Cancer Cell Lines

#### A. Lentiviral preparation.

- Transfect Lenti-X 293T (Clontech) cells in 6-well plate with Cas9 plasmid containing the barcode.
- Collect viruses after 48h. The typical viral titer should be around  $2 \times 10^6$ /ml.
- Viruses are used for infection freshly (within 7 days in  $4^\circ\text{C}$ ), or can be frozen in  $-80^\circ\text{C}$ .

#### B. Cell line Cas9-enabling and barcoding.

- Thaw cells to be engineered.
- Day 0: Plate  $2.5 \times 10^5$  cells in 12-well plates (2 wells per cell line, 1 will be infected and 1 will not be infected and serve as control). Add 1 ml of lentiviral stock and  $4 \mu\text{g/ml}$  Polybrene for infection.
- Day 1: Change to fresh medium.
- Day 2: Split the cells and seed to 6-well plate. Start Blasticidin selection (typically  $20 \mu\text{g/ml}$ , up to  $40 \mu\text{g/ml}$  for some cell lines, to completely kill cells in control well) to enrich infected cells.
- Day x: Expand cells to 10 cm dish under Blasticidin selection.

#### C. Cas9 activity test.

- Prepare reporter virus stock. The typical viral titer should be around  $5 \times 10^6$ /ml.
- Day 0: Plate  $2.5 \times 10^5$  cells in 12-well plates (2 wells per cell line, 1 with parental cells and 1 with Cas9 enabled cells). Add 0.05 ml of reporter viral stock for infection.
- Day 1: Change to fresh medium.
- Day 3: Split the cells, leave  $\frac{1}{4}$  of the cells in the well. The rest of the cells are used for cytometry flow assay to determine percentage of RFP and GFP positive cells.
- Day 6: Trypsinize the cells and repeat the cytometry flow assay as on Day 3.
- Analysis. The parental cells should be either RFP+GFP+ or RFP-GFP-. (RFP+GFP+) % on Day 3 is used to estimate cell infectability. The Cas9 enabled cells should be RFP+GFP+, RFP-GFP+, or RFP-GFP-. Cas9 efficiency is determined by:  $(\text{GFP-RFP+})\% / (\text{all RFP+})\%$

### II. Mixing Cancer Cell Lines

- After Cas9 efficiency test, the Cas9 enabled and barcoded cells are expanded and frozen down individually as stocks.
- For convenience,  $\sim 20$  individual Cas9 enabled and barcoded cell lines (typically from same tumor lineage) are further subpooled and frozen down ( $1.5 \times 10^5$  cells per line/vial).

### III. Compound screen (workflow shown in Supplementary Figure 7)

- Day -1: Thaw cells from frozen subpools. Seed  $5 \times 10^5$  cells/well with 3 ml medium in 6-well plate. **Cell number estimation: total 400 lines,  $\sim 1250$  cells/line.**
- Day 0: Add compounds to wells at the final concentrations of 0,  $0.01 \mu\text{M}$ ,  $0.1 \mu\text{M}$ ,  $1 \mu\text{M}$ ,  $10 \mu\text{M}$ .
- Day 3: Split cells from each well into two 100 mm dishes:  $1/5$  cells for day 10 sample collection.  $4/5$  cells for day 5 samples collection. Continue compounds treatment at concentrations of 0,  $0.01 \mu\text{M}$ ,  $0.1 \mu\text{M}$ ,  $1 \mu\text{M}$ ,  $10 \mu\text{M}$ .

- Day 5: Trypsinize cells, rinse cell pellets once with PBS, and store cell pellets at -80°C.
  - Day 7: Change medium of Day 10 sample dishes, and continue compounds treatment.
  - Day 10: Trypsinize cells, rinse cell pellets once with PBS once, and store cell pellets at -80°C.
- \*Each treatment condition is triplicated.**

#### IV. CRISPR screen (workflow shown in Supplementary Figure 7)

- Prepare sgRNA lentiviruses for targets of interest, store viruses at -80°C. Biological titer is determined by infecting 293T cells with serial diluted viral stock. The typical viral titer should be around  $5 \times 10^6$ /ml.
  - Day -1: Thaw cells from frozen subpools. Seed  $5 \times 10^5$  cells/well with 3 ml medium in 6-well plate. **Cell number estimation: total 400 lines, ~1250 cells/line.**
  - Day 0: Infect cells with 2 ml medium containing  $2.5 \times 10^6$  viral particles and 4  $\mu$ g/ml Polybrene. **This makes multiplicity of infection (MOI) to ~5.**
  - Day 1: Change to fresh medium, and start Puromycin selection at 2  $\mu$ g/ml.
  - Day 3: Collect Day 3 samples. Split cells from each well to two 100 mm dishes: 1/5 cells for Day 13 samples collection, 4/5 cells for Day 7 samples collection. All cells are cultured in medium with 2  $\mu$ g/ml Puromycin.
  - Day 7: Trypsinize cells, rinse cell pellets once with PBS, and store cell pellets at -80°C.
  - Day 13: Trypsinize cells, rinse cell pellets once with PBS, and store cell pellets at -80°C.
- \*Each treatment condition is triplicated.**

#### V. Extracting Genomic DNA

- Extract genomic DNA using QiaAmp Fast DNA Tissue kit (Qiagen), with RNase A treatment upon cell lysis to eliminate cellular RNA.
- Measure genomic DNA concentration with TapeStation 4200 (Agilent, Genomic DNA Tape).

#### VI. NGS library preparation and sequencing

##### PCR1-Amplify barcodes:

- This step is to amplify barcodes from each genomic DNA sample.

| Reagents                    | Volume ( $\mu$ l) | Notes                       |
|-----------------------------|-------------------|-----------------------------|
| 1 $\mu$ g genomic DNA       | 20                |                             |
| Forward Primer (10 $\mu$ M) | 3                 | 5'-ACAACAAGCACCGGGATAAG-3'  |
| Reverse Primer (10 $\mu$ M) | 3                 | 5'-AGGAACTGCTTCCTTCAC GA-3' |
| 10 mM dNTP (10 mM)          | 2                 | Takara Bio. Cat#639242      |
| 10 x Titanium Taq Buffer    | 10                |                             |
| Titanium Taq Polymerase     | 2                 |                             |
| H <sub>2</sub> O            | 60                |                             |
| Total                       | 100               |                             |

PCR Conditions

|                  |                 |
|------------------|-----------------|
| 94°C, 2 minutes  |                 |
| 94°C, 45 seconds | Total 25 cycles |
| 65°C, 15 seconds |                 |
| 72°C, 30 seconds |                 |
| 72°C, 2 minutes  |                 |

- Clean PCR1 products with SPRI bead method (Beckman Coulter SRPI Select Reagent, Cat#B23317). Elute in 30 µl Qiagen EB buffer.
- Quantify eluted PCR1 product on TapeStation 4200.

**PCR2-NGS library:**

- This step is to multiplex samples.

| Reagents                            | Volume (µl) | Notes                                                                                                               |
|-------------------------------------|-------------|---------------------------------------------------------------------------------------------------------------------|
| 1 ng PCR1 product                   | 20          |                                                                                                                     |
| TruSeq-D50 Barcode F Primer (10 µM) | 3           | 5'-AATGATACGGCG<br>ACCACCGAGATCTACA<br>C-Barcode-<br>CACGGATCGACCTGTC<br>TCAG-3'                                    |
| TruSeq-D50 Barcode R Primer (10 µM) | 3           | 5'-<br>CAAGCAGAAGACGGCA<br>TACGAGAT-barcode-<br>GTGACTGGAGTTCAGA<br>CGTGTGCTCTCCGATC<br>TGCCAAAAGACGGCAA<br>TATG-3' |
| 10 mM dNTP (10 mM)                  | 2           | Takara Bio.<br>Cat#639242                                                                                           |
| 10 x Titanium Taq Buffer            | 10          |                                                                                                                     |
| Titanium Taq Polymerase             | 2           |                                                                                                                     |
| H <sub>2</sub> O                    | 60          |                                                                                                                     |
| Total                               | 100         |                                                                                                                     |

PCR2 Conditions

|                  |                |
|------------------|----------------|
| 94°C, 2 minutes  |                |
| 94°C, 45 seconds | Total 6 cycles |
| 65°C, 15 seconds |                |
| 72°C, 30 seconds |                |
| 72°C, 2 minutes  |                |
| 94°C, 2 minutes  |                |
| 94°C, 45 seconds | Total 6 cycles |
| 71°C, 15 seconds |                |
| 72°C, 30 seconds |                |
| 72°C, 2 minutes  |                |

- Clean PCR2 products with SPRI bead method (Beckman Coulter SRPI Select Reagent, Cat#B23317). Elute in 30 µl Qiagen EB buffer.
- Quantify eluted PCR2 product on TapeStation 4200.

#### NGS library sequencing:

- Mix up to 96 PCR2 products (10 nmol each) to make a sequencing pool.
- Assess the pooled sequencing library for quality and quantity with TapeStation 4200.
- Add 10% molar ratio spike-in PhiX to each pool to enhance sequence diversity.
- Submit libraries for NGS sequencing.

### VII. Data analysis

- Raw NGS sequencing data was decomplexed using TruSeq-D50 Barcode pairs.
- The MAGeCK pipeline (version 0.5.9) was then used to process and analyze the 26-bp PRISM barcodes. First, the command 'mageck count' was used to map raw sequencing reads with no mismatch allowed, to the PRISM barcode library. We also conducted a thorough examination of the data quality (total reads generated per sample, percentage of mapped reads, zero cell line count, etc). The criteria for samples to pass the quality control include: mapping rate  $\geq 70\%$ , zero cell line count  $\leq 5\%$  of total cell lines in the PRISM assay.
- Raw cell line counts were finally normalized to the median count of the negative control cell lines included in the PRISM cell line pool.

#### Compound screen

- For each treatment condition, raw count of each tumor cell line was normalized to two 293T control lines (assuming 293T does not respond to compound treatment). **For those compounds that have effect on 293T cells, raw counts were further normalized according to 293T DRC curve obtained from CTG assay.**
- Normalized count of each compound treatment condition was then divided by count of DMSO treated samples, and AUC was calculated to determine the sensitivity of cell lines to this compound.

#### CRISPR screen

- For each treatment condition, raw count of each tumor cell line was normalized to two 293T-Cas9del control lines (These cells express truncated Cas9 protein so that they don't respond to sgRNA-mediated knockout).
- Normalized count of each sgRNA treatment condition was then divided by count of Non-targeting sgRNA treated samples, and relative depletion ratio was calculated to determine the sensitivity of cell lines to this genetic knockout.

| Cell line | EGFR mutation | Other mutation       | EGFR expression | EGFR copy number |
|-----------|---------------|----------------------|-----------------|------------------|
| HCC827    | p.ELREA701del | TP53                 | 8.984609855     | 3.2468           |
| PC-9      | p.ELREA746del | TP53                 | 6.400663841     | NA               |
| HCC4006   | p.ELR746del   | TP53                 | 5.805899116     | 1.3014           |
| NCI-H1650 | p.ELREA701del | TP53, PTEN?          | 5.363228432     | 1.1195           |
| NCI-H292  | WT            |                      | 5.360771013     | 0.5242           |
| SK-MES-1  | WT            | TP53                 | 5.22129564      | 0.5968           |
| HCC44     | WT            | TP53, KRAS           | 5.11268814      | 0.3605           |
| A549      | WT            | KRAS                 | 4.772872702     | 0.1163           |
| NCI-H1975 | L858R, T790M  | TP53, PIK3CA, CDKN2A | 4.722315693     | 0.793            |
| NCI-H2126 | WT            |                      | 4.454446149     | 0.3287           |
| NCI-H1755 | WT            | TP53, BRAF           | 4.349176193     | 0.4782           |
| NCI-H441  | WT            | TP53, KRAS           | 4.000894033     | -0.2181          |
| NCI-H2009 | WT            | TP53, KRAS           | 3.647897428     | -0.0483          |
| NCI-H358  | WT            | KRAS                 | 3.286860177     | -0.118           |
| NCI-H23   | WT            | TP53, KRAS           | 3.282020555     | 0.4              |
| NCI-H1299 | WT            | NRAS                 | 2.795867648     | -0.2912          |
| NCI-H460  | WT            | KRAS, PIK3CA         | 2.290724803     | -1.3464          |
| NCI-H2170 | WT            | P53                  | 0.424679019     | 0.3615           |
| NCI-H520  | WT            | P53                  | -2.47360452     | 0.0852           |
| NCI-H522  | WT            | MTOR                 | -3.840191935    | 0.8515           |

**Supplementary Table 1. Characteristics of 20 NSCLC cell lines in the pilot EGFR screen.**

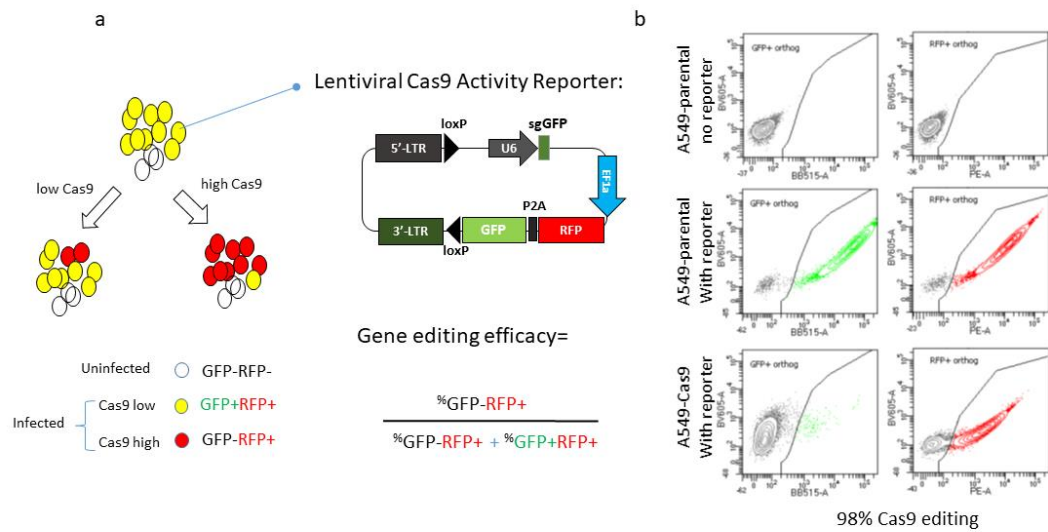

**Supplementary Figure 1. Lentiviral Cas9 activity reporter assay for CRISPR editing efficiency quality control.** **a.** The lentiviral vector expresses RFP-P2A-GFP and sgRNA against GFP. When it infects a cell with decent Cas9 activity, the sgRNA edits GFP ORF and silences its expression, thus the cell only has RFP signal. The Cas9 editing efficacy is calculated as indicated. **b.** An example of flow cytometry result from A549 parental and Cas9-engineered cells when infected with lentiviral Cas9 activity reporter.

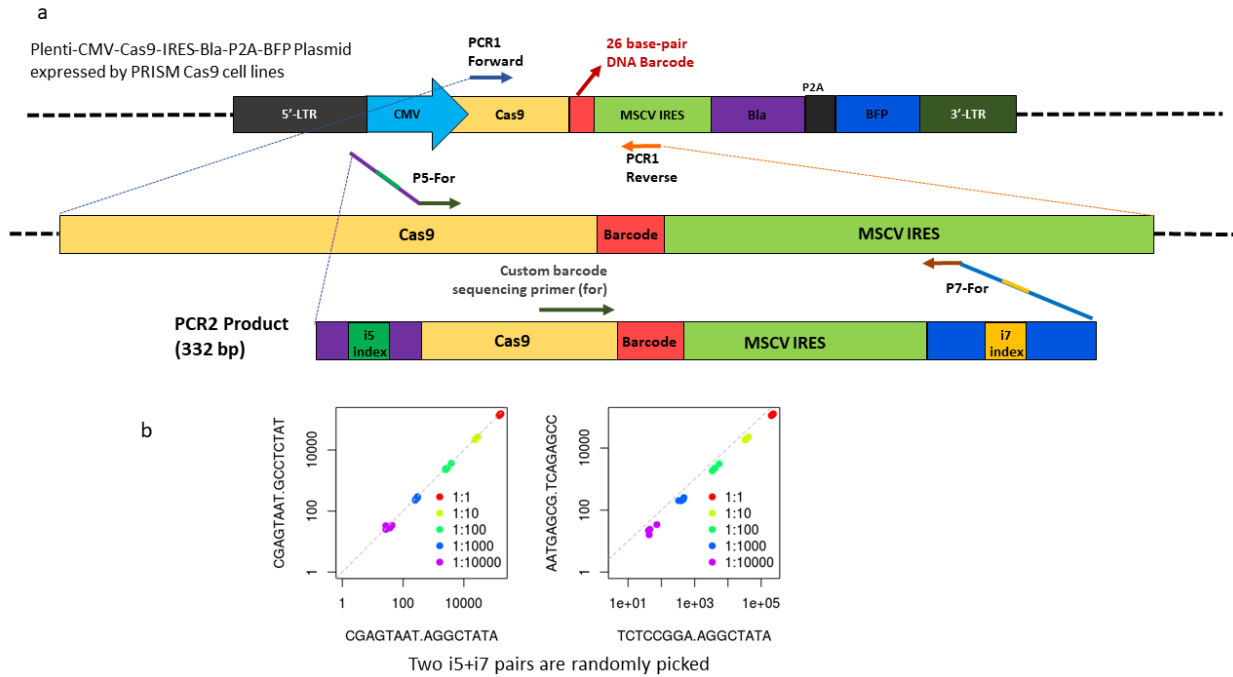

**Supplementary Figure 2. Next-generation sequencing library preparation for detecting relative barcode abundance in the sample mix. a.** Diagram of two-round PCR amplification of barcodes. PCR1 uses universal primers to amplify barcode regions from genomic DNA or plasmids mix. PCR2 adds dual-indexed Illumina primers to the barcode libraries for multiplexed sequencing. **b.** 20 barcode plasmids were mixed at different concentrations to evaluate the detection limit of Next-generation sequencing protocol.



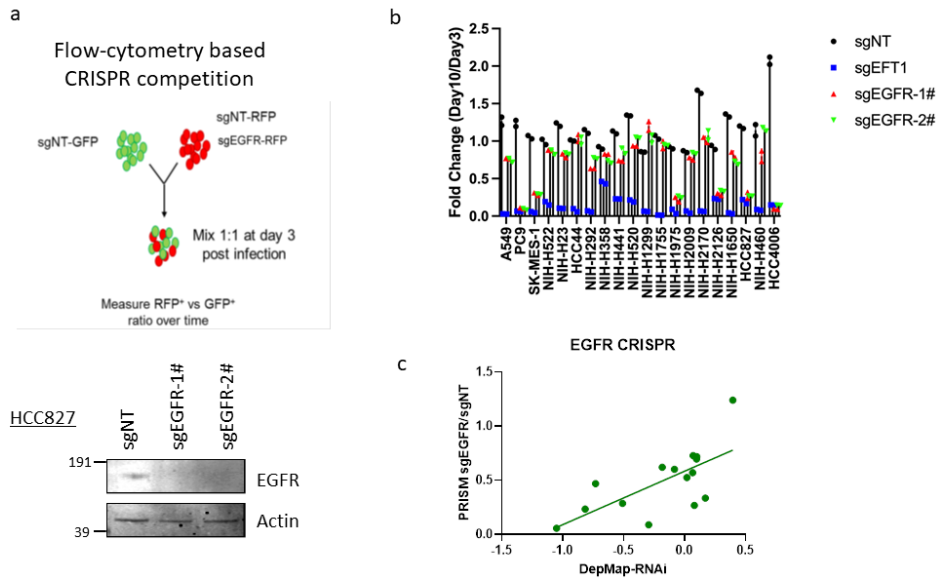

**Supplementary Figure 3. EGFR dependency was evaluated in 20 NSCLC cell lines using individual CRISPR competition assay. a.** Diagram showing the principle of CRISPR competition assay. **b.** 7-day CRISPR competition assay results of the 20 NSCLC cell lines after EGFR knockout. sgNT, non-targeting sgRNA used as negative control; sgETF1, sgRNA against essential gene ETF1 used as positive control; sgEGFR-1# and -2#, two sgRNAs against EGFR gene. Error bars represent standard error of the mean. n=2 biologically independent samples. **c.** Correlation analysis of EGFR CRISPR PRISM assay vs DepMap gene effect score (DEMETER, 15 cell lines,  $r=0.6813$ ). Related to **Figure 2f**.

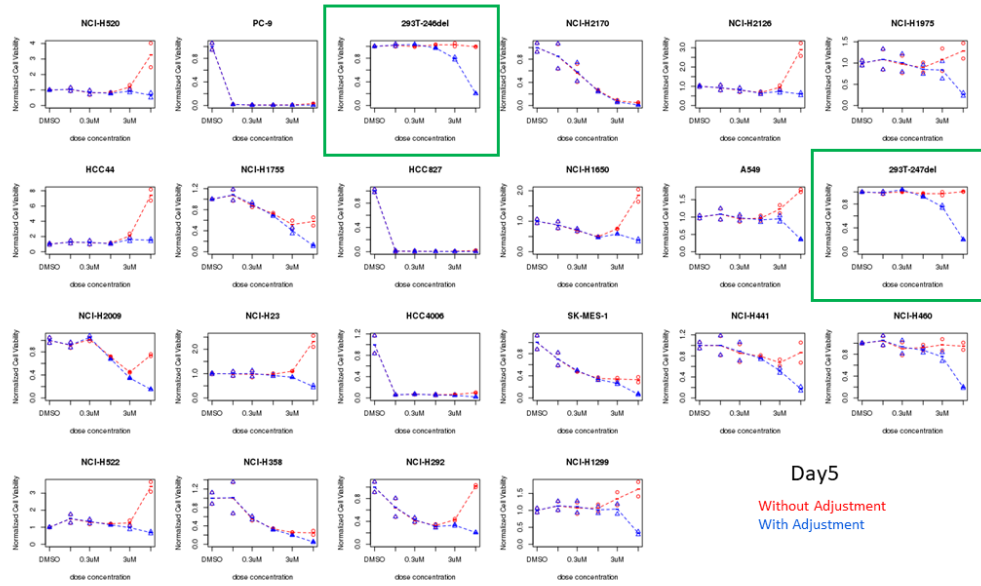

Day5

Without Adjustment  
With Adjustment

**Supplementary Figure 4. Adjustment of Dose responsive curve after Erlotinib treatment.** The adjustment was performed according to individual 293T CTG assay result. Detailed methodology was described in *Supplementary methods*.

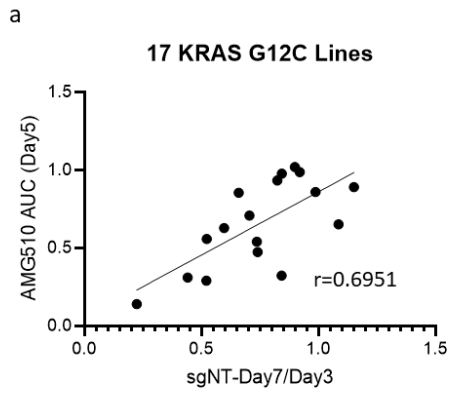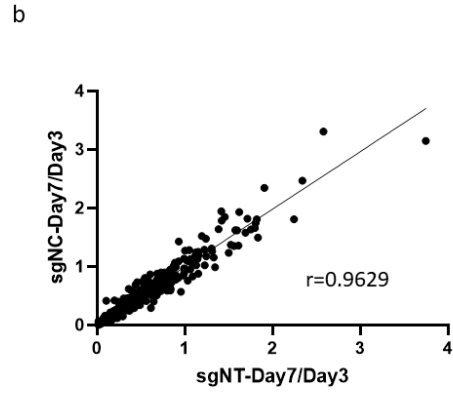

**Supplementary Figure 5. Related to Figure 3.** a. Correlation of KRAS CRISPR knockout vs AMG-510 treatment of 17 KRAS G12C cancer cell lines in the BMS-PRISM screen. b. Relative cell abundance of each cell line in the BMS-PRISM upon the infection of sgNT and sgNC.

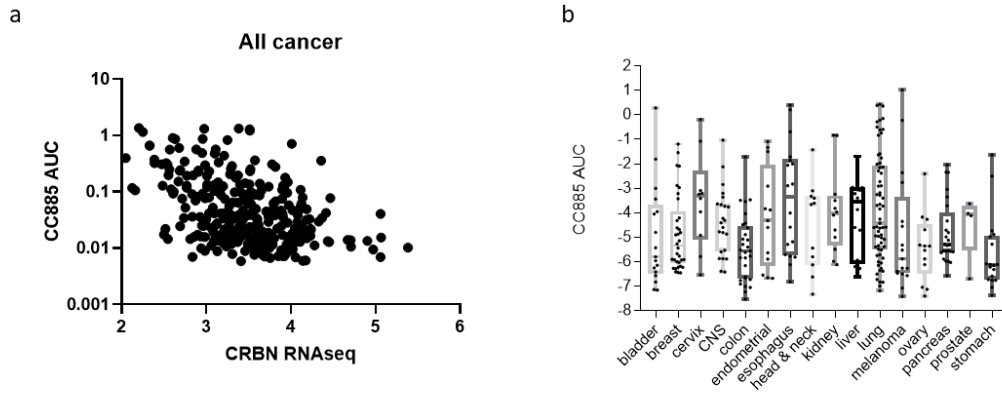

**Supplementary Figure 6. CC-885 PRISM screen result indicated the relation between cytotoxicity and Cereblon expression level.** a. Correlation of CRBN mRNA score (Cancer Cell Line Encyclopedia, mRNA expression RNAseq) and 5-day CC-885 AUC in PRISM screen. b. CC-885 AUC distribution across major cancer indications in BSM-PRISM library. Error bars represent standard error of the mean. Cell line numbers in each group were: bladder (n=17), breast (n=34), cervix (n=10), CNS (n=23), colon (n=29), endometrial (n=13), esophagus (n=18), head & neck (n=11), kidney (n=12), liver (n=19), lung (n=65), melanoma (n=17), ovary (n=13), pancreas (n=25), prostate (n=4), stomach (n=18).

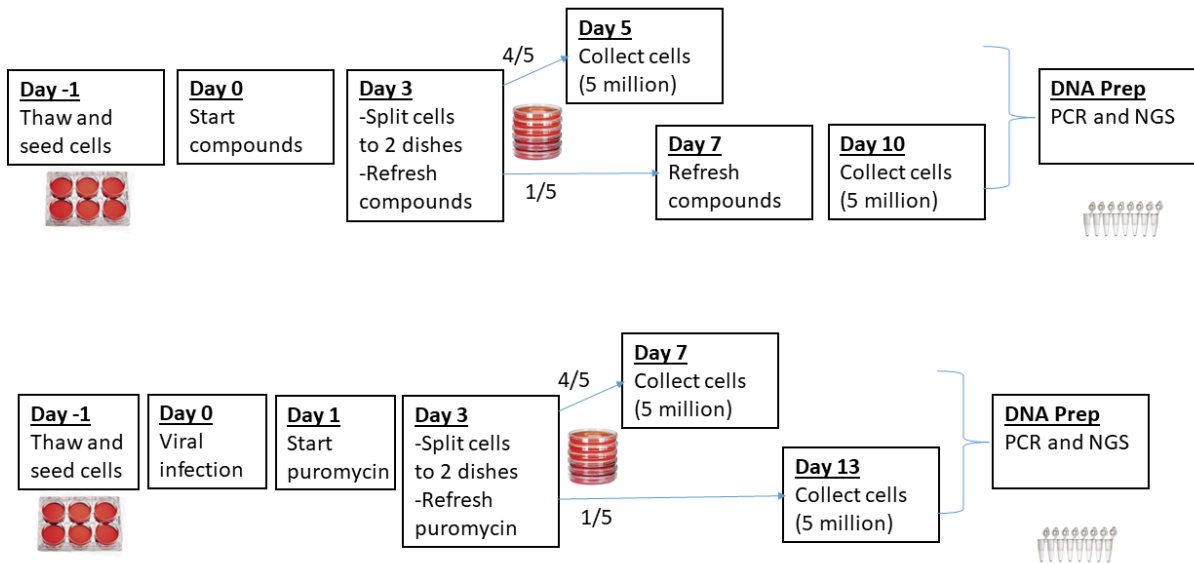

**Supplementary Figure 7. Workflow of BMS-PRISM screen.** Detailed methodology is described in *Supplementary Methods*.

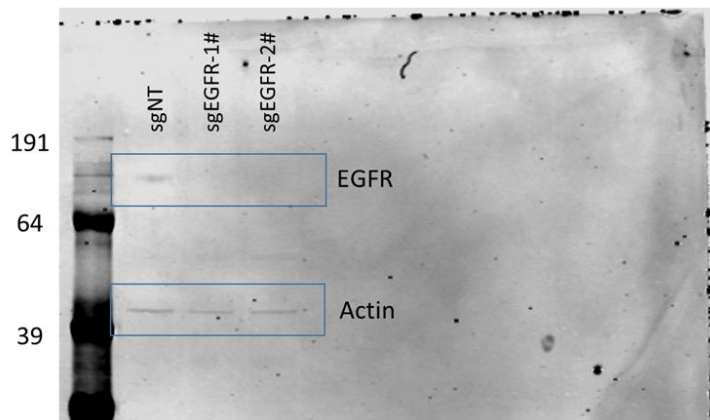

Supplementary Figure 8. Full scan of western blot in Supplementary Figure 3a.
